# Supplementary material for: MiR-371-5p regulates trophoblast cell proliferation, migration, and invasion by directly targeting ZNF516
Source: publisher site journal article supplement (doi:10.18632/aging.205826), 2024-05-17
Supplement: Supplementary file [file aging-v16i10-205826-supplementary-material-SD2.pdf]

## SUPPLEMENTARY TABLES

**Supplementary Table 1. The clinical characteristics of the participants (Mean  $\pm$  SD).**

|                                 | <b>Control<br/>n = 71</b> | <b>EOPE<br/>n = 34</b> | <b>LOPE<br/>n = 55</b> |
|---------------------------------|---------------------------|------------------------|------------------------|
| Age (years)                     | 31. 15 $\pm$ 4. 99        | 31. 71 $\pm$ 4. 52     | 30. 02 $\pm$ 4. 35     |
| Gestational Weeks               | 37. 82 $\pm$ 1. 35        | 31. 68 $\pm$ 0. 85     | 42. 67 $\pm$ 18. 71    |
| Hb (g/L)                        | 117. 61 $\pm$ 17. 50      | 112. 40 $\pm$ 18. 12   | 104. 5 $\pm$ 26. 42    |
| BMI (kg/m <sup>2</sup> )        | 24. 47 $\pm$ 4. 21        | 26. 73 $\pm$ 4. 08     | 26. 61 $\pm$ 4. 72     |
| D-DIC (mg/L)                    | 0. 54 $\pm$ 0. 19         | 1. 97 $\pm$ 0. 82      | 1. 95 $\pm$ 0. 78      |
| FIB (g/L)                       | 4. 34 $\pm$ 1. 01         | 5. 20 $\pm$ 1. 64      | 5. 32 $\pm$ 1. 45      |
| Neonatal Weight (kg)            | 3. 16 $\pm$ 0. 65         | 1. 35 $\pm$ 0. 37      | 2. 90 $\pm$ 0. 63      |
| 24UPro (mg/24 h)                | 133. 71 $\pm$ 73. 74      | 1006 $\pm$ 556. 4      | 870. 5 $\pm$ 598. 2    |
| Scr (umol/L)                    | 50. 96 $\pm$ 12. 21       | 55. 24 $\pm$ 17. 67    | 60. 67 $\pm$ 18. 35    |
| PLT (10 <sup>9</sup> /L)        | 185. 30 $\pm$ 50. 75      | 175. 60 $\pm$ 60. 72   | 153. 70 $\pm$ 71. 04   |
| ALT (U/L)                       | 16. 14 $\pm$ 6. 93        | 51. 62 $\pm$ 14. 64    | 53. 09 $\pm$ 14. 92    |
| AST (U/L)                       | 22. 07 $\pm$ 7. 05        | 40. 82 $\pm$ 13. 02    | 42. 58 $\pm$ 13. 56    |
| SBP (mmHg)                      | 109. 80 $\pm$ 10. 89      | 163. 80 $\pm$ 14. 88   | 178. 60 $\pm$ 17. 28   |
| DBP (mmHg)                      | 66. 79 $\pm$ 7. 83        | 83. 00 $\pm$ 9. 58     | 85. 96 $\pm$ 17. 08    |
| WBC (* 10 <sup>9</sup> /L)      | 9. 38 $\pm$ 2. 49         | 11. 28 $\pm$ 1. 94     | 12. 08 $\pm$ 2. 52     |
| PMN(* 10 <sup>9</sup> /L)       | 5. 85 $\pm$ 1. 59         | 8. 46 $\pm$ 1. 62      | 9. 04 $\pm$ 2. 05      |
| Total Ca <sup>2+</sup> (mmol/L) | 2. 35 $\pm$ 0. 21         | 2. 03 $\pm$ 0. 089     | 2. 05 $\pm$ 0. 12      |

**Supplementary Table 2. The primer sequences for PCR.**

| <b>Gene name</b> | <b>Primer orientation</b> | <b>Sequences</b>                                      |
|------------------|---------------------------|-------------------------------------------------------|
| ZNF516           | Forward                   | 5'-GGACCCGGTCAACAGCTAC-3'                             |
|                  | Reverse                   | 5'-GGCCCCGTACTTGAGGTACT-3'                            |
|                  | Forward                   | 5'-GGAGCGAGATCCCTCCAAAAT-3'                           |
| GAPDH            | Reverse                   | 5'-GGCTGTTGTCATACTTCTCATGG-3'                         |
|                  | Forward                   | 5'-ACACTCCAGCTGGGAACTGGCCCTCAAAGT-3'                  |
| hsa-miR-193b     | Reverse                   | 5'-CTCAACTGGTGTCTCGTGGAGTCGGCAATTCAGTTGAG AGCGGGAC-3' |
|                  | Forward                   | 5'-ACACTCCAGCTGGGCTGTGCGTGTGACAGC-3'                  |
| hsa-miR-210-3p   | Reverse                   | 5'-CTCAACTGGTGTCTCGTGGAGTCGGCAATTCAGTTGAGTCAGCCGC-3'  |
|                  | Forward                   | 5'-ACACTCCAGCTGGGAACTGGCCCTACAAAGT-3'                 |
| hsa-miR-193a-3p  | Reverse                   | 5'-CTCAACTGGTGTCTCGTGGAGTCGGCAATTCAGTTGAGACTGGGAC-3'  |
|                  | Forward                   | 5'-ACACTCCAGCTGGGACTCAAACGTGGG-3'                     |
| hsa-miR-371-5p   | Reverse                   | 5'-CTCAACTGGTGTCTCGTGGAGTCGGCAATTCAGTTGAG AGTGCCCC-3' |
|                  | Forward                   | 5'-ACACTCCAGCTGGGACAGGTGAGGTTCTTG -3'                 |
| hsa-miR-125a-3p  | Reverse                   | 5'-CTCAACTGGTGTCTCGTGGAGTCGGCAATTCAGTTGAGGGCTCCCA-3'  |
|                  | Forward                   | 5'-CTCGCTTCGGCAGCACA-3'                               |
| U6snRNA          | Reverse                   | 5'-AACGCTTCACGAATTTGCGT-3'                            |

Supplementary Table 3. The binding site of ZNF516 to hsa-miR-371-5p through the use of TargetScan ([https://www.targetscan.org/vert\\_80/](https://www.targetscan.org/vert_80/)).

| Conserved                       |                                                                          |           |                  |                             |                          |                         |      |                       |
|---------------------------------|--------------------------------------------------------------------------|-----------|------------------|-----------------------------|--------------------------|-------------------------|------|-----------------------|
|                                 | Predicted consequential pairing of target region (top) and miRNA(bottom) | Site type | Context ++ score | Context+ + score percentile | Weighted Context++ score | Conserved branch length | PC T | Predicted relative Kp |
| Position 350-357 of ZNF5163'UTR | 5'...UCUUAUUCAAGACAAGUUUGA<br>GA..                                       | 8mer      | -0.03            | 82                          | -0.03                    | 2.049                   | N/A  | -4.864                |
| hsa-miR-371a-5p                 | 3'...UCACGGGGGUGUCAAAACUCA..                                             |           |                  |                             |                          |                         |      |                       |
